# Supplementary material
Source: PubMed Central journal article supplement (PMC5894119)
Supplement: NIHMS874326-supplement.pdf [file NIHMS874326-supplement.pdf]

**Appendix Table 1.** Adjusted<sup>a</sup> Mean Estimates for Percent Cycling to School by Experimental Group (Mean  $\pm$  SE).

|              | <b>Time 1</b> | <b>Time 2</b>  |
|--------------|---------------|----------------|
| Intervention | 0.6 $\pm$ 4.9 | 55.8 $\pm$ 5.0 |
| Control      | 2.4 $\pm$ 4.5 | 12.8 $\pm$ 4.7 |

<sup>a</sup>Adjusted for age, sex, race/ethnicity, BMI z-score, neighborhood disorder, distance from home to school, and Bike Score.

**Appendix Table 2.** Adjusted<sup>a</sup> Mean Estimates for Daily Minutes of MVPA by Experimental Group (Mean  $\pm$  SE)

|              | <b>Time 1</b>  | <b>Time 2</b>  |
|--------------|----------------|----------------|
| Intervention | 40.2 $\pm$ 4.3 | 57.0 $\pm$ 4.3 |
| Control      | 47.6 $\pm$ 3.8 | 42.8 $\pm$ 4.0 |

<sup>a</sup>Adjusted for age, sex, race/ethnicity, BMI z-score, neighborhood disorder, distance from home to school, Bike Score, and accelerometer wear time.

MVPA, moderate-to-vigorous physical activity

**Appendix Table 3.** Repeated Measures Mixed Effects Model for Cycling-MVPA (Average Minutes/Day)

| <b>Variable</b>                      | <b>Beta coefficient</b> | <b>95% CI</b>     |
|--------------------------------------|-------------------------|-------------------|
| <b>Group</b>                         |                         |                   |
| Control                              | Ref                     |                   |
| Intervention                         | -6.1                    | -15.6, 3.3        |
| <b>Time</b>                          |                         |                   |
| Time 1                               | Ref                     |                   |
| Time 2                               | -1.6                    | -10.0, 6.8        |
| Group × Time                         | <b>23.0</b>             | <b>10.7, 35.4</b> |
| Age                                  | -3.7                    | -8.8, 1.5         |
| <b>Sex</b>                           |                         |                   |
| Female                               | Ref                     |                   |
| Male                                 | 6.6                     | -1.3, 14.4        |
| <b>Race/Ethnicity</b>                |                         |                   |
| Non-Latino white                     | Ref                     |                   |
| Non-Latino black                     | 6.1                     | -11.3, 23.5       |
| Latino                               | 2.4                     | -14.4, 19.2       |
| Asian                                | -2.0                    | -19.2, 15.3       |
| Other                                | -1.8                    | -19.6, 16.0       |
| BMI z-score                          | -1.2                    | -5.3, 2.9         |
| Neighborhood disorder                | 0.5                     | -0.04, 1.0        |
| Distance from home to school (miles) | 5.7                     | -1.1, 12.6        |
| Bike Score                           | 0.2                     | -0.03, 0.4        |
| Wear time (min/day)                  | -0.02                   | -0.06, 0.02       |

*Note:* Boldface indicates statistical significance ( $p < 0.05$ ).

MVPA, moderate-to-vigorous physical activity

**Appendix Table 4.** Repeated Measures Mixed Effects Model for Before- and After-school MVPA (Average Minutes/Day)

| <b>Variable</b>                      | <b>Beta coefficient</b> | <b>95% CI</b>      |
|--------------------------------------|-------------------------|--------------------|
| <b>Group</b>                         |                         |                    |
| Control                              | Ref                     |                    |
| Intervention                         | 0.8                     | -3.0, 4.6          |
| <b>Time</b>                          |                         |                    |
| Time 1                               | Ref                     |                    |
| Time 2                               | -0.9                    | -3.8, 2.1          |
| Group × Time                         | <b>12.8</b>             | <b>8.5, 17.2</b>   |
| Age                                  | 0.4                     | -1.8, 2.6          |
| <b>Sex</b>                           |                         |                    |
| Female                               | Ref                     |                    |
| Male                                 | 3.2                     | -0.2, 6.5          |
| <b>Race/Ethnicity</b>                |                         |                    |
| Non-Latino white                     | Ref                     |                    |
| Non-Latino black                     | -7.4                    | -15.1, 0.2         |
| Latino                               | -2.5                    | -9.8, 4.9          |
| Asian                                | <b>-8.2</b>             | <b>-15.7, -0.6</b> |
| Other                                | -5.6                    | -13.4, 2.2         |
| BMI z-score                          | <b>-2.0</b>             | <b>-3.7, -0.2</b>  |
| Neighborhood disorder                | -0.002                  | -0.2, 0.2          |
| Distance from home to school (miles) | 2.4                     | -0.6, 5.3          |
| Bike Score                           | 0.08                    | -0.02, 0.2         |

*Note:* Boldface indicates statistical significance ( $p < 0.05$ ).

MVPA, moderate-to-vigorous physical activity
